# Supplementary material
Source: PubMed Central journal article supplement (PMC3558528)
Supplement: NIHMS434721-supplement-1.pdf [file NIHMS434721-supplement-1.pdf]

# Proline Kink Angle Distributions for GWALP23 in Lipid Bilayers of Different Thickness

*Johanna M. Froyd-Rankenbergl, Vitaly V. Vostrikovl, Christopher D. DuValll, Denise V. Greathousel, Roger E. Koeppe IIl\*, Christopher V. Grant2 and Stanley J. Opella2*

<sup>1</sup>Department of Chemistry and Biochemistry, University of Arkansas, Fayetteville, AR 72701,  
and <sup>2</sup>Department of Chemistry and Biochemistry,  
University of California, San Diego; La Jolla, CA 92093

## Supporting Information.

**Figure S1.** MALDI mass spectra of a synthetic GWALP23-P12 peptide with two labeled alanines (Ala-d4) at different isotope abundance levels.

**Figure S2.** Reversed-phase HPLC chromatogram of a synthetic GWALP23-P12 peptide.

**Figure S3.** Representative <sup>31</sup>P NMR spectra of DOPC bilayers, with GWALP23-P12 incorporated.

**Figure S4.** <sup>2</sup>H NMR spectra for labeled Ala methyl groups C-terminal to the proline in GWALP23-P12, in oriented bilayers of DLPC, DMPC and DOPC.  
Sample orientation is  $\beta = 0^\circ$ .

**Figure S5.** <sup>2</sup>H NMR spectra for labeled Ala methyl groups N-terminal to the proline in GWALP23-P12, in oriented bilayers of (left to right) DLPC, DMPC and DOPC.  
Sample orientation is  $\beta = 0^\circ$ .

**Figure S6.** Segmental tilt distributions in DLPC and DOPC.

**Figure S7.** Distributions of proline-induced helix unwinding (“swivel”) angles for GWALP23-P12 in (A) DLPC, (B) DMPC and (C) DOPC.

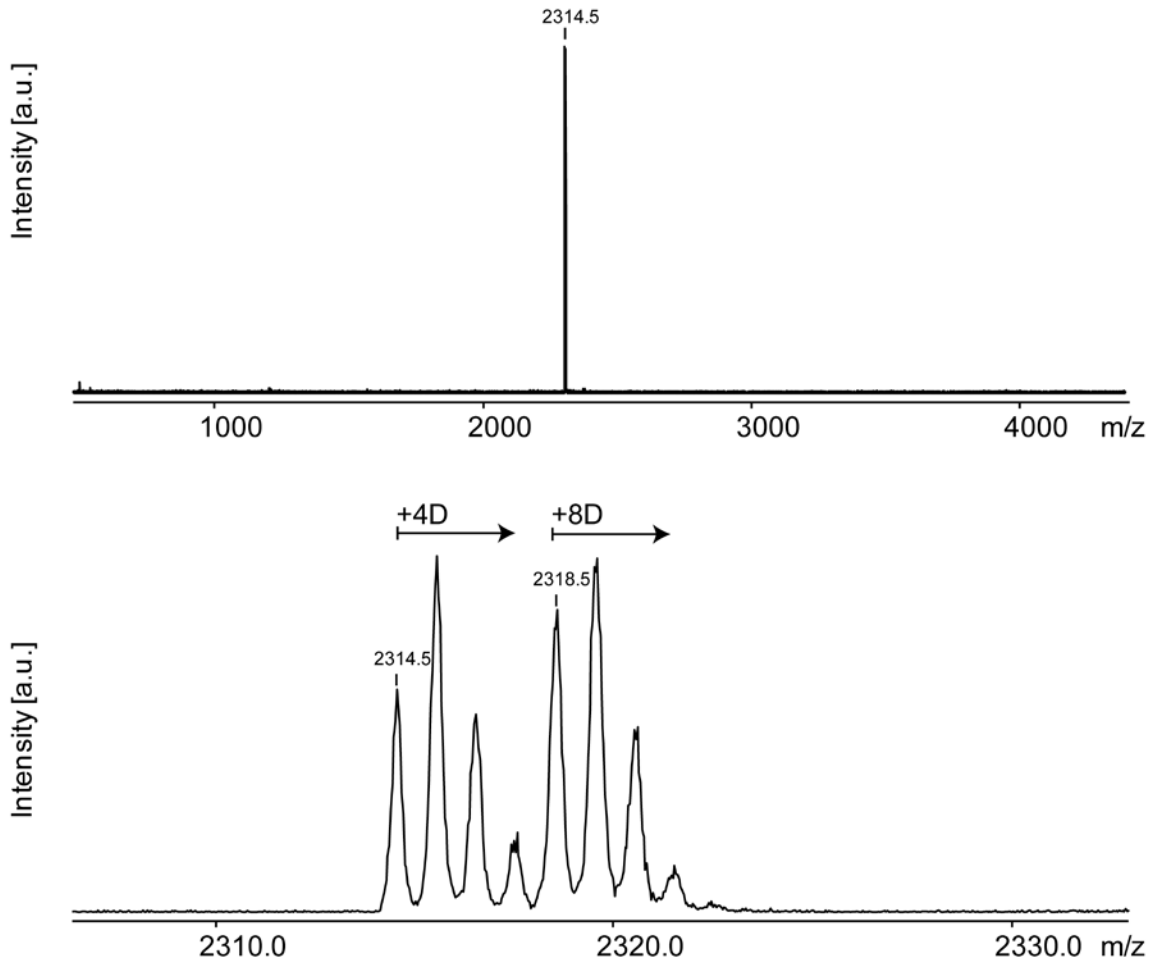

**Figure S1.** MALDI mass spectra of a synthetic GWALP23-P12 peptide with two labeled alanines (Ala-d4) at different isotope abundance levels.

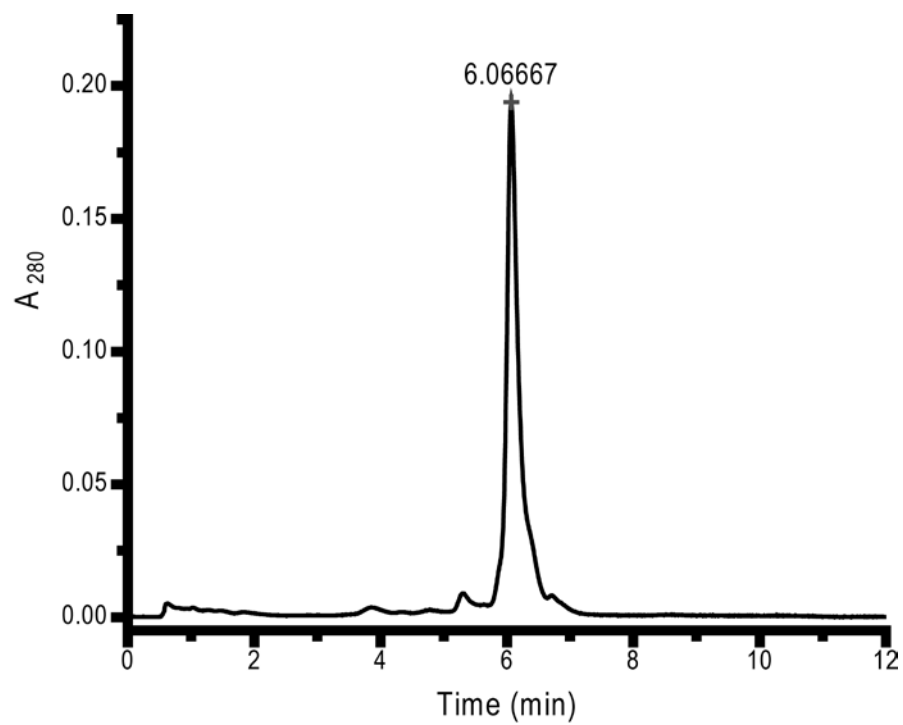

**Figure S2.** Reversed-phase HPLC chromatogram of a synthetic GWALP23-P12 peptide with <sup>2</sup>H-labeled alanines in two sequence positions.

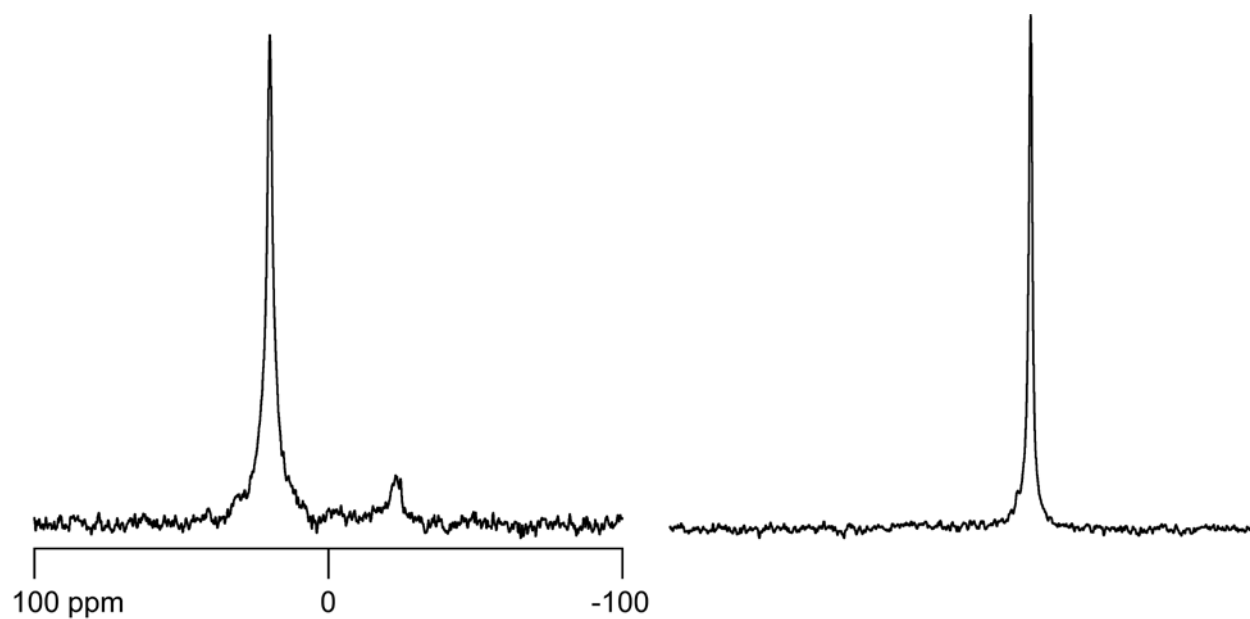

**Figure S3.** Representative  $^{31}\text{P}$  NMR spectra of DOPC bilayers, with GWALP23-P12 incorporated, at  $\beta=0^\circ$  (left) and  $\beta=90^\circ$  (right) sample orientations.

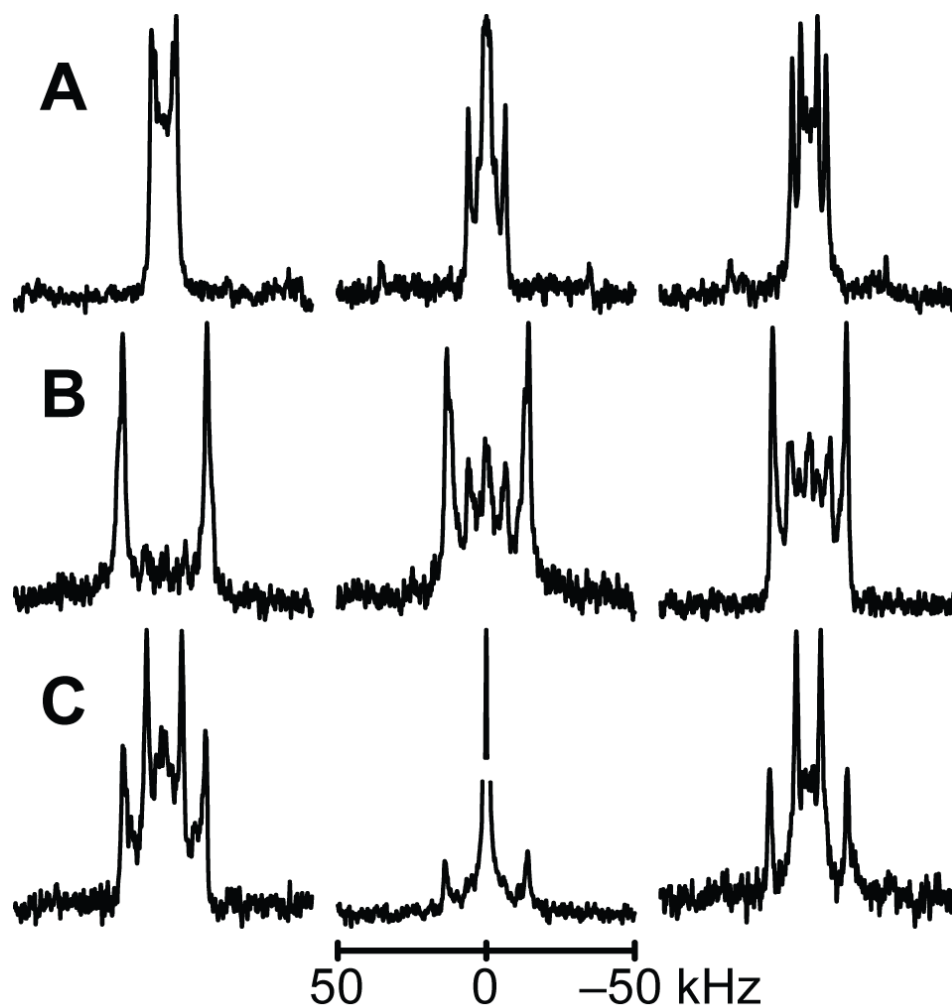

**Figure S4.**  $^2\text{H}$  NMR spectra for labeled Ala methyl groups C-terminal to the proline in GWALP23-P12, in oriented bilayers of DLPC, DMPC and DOPC. Sample orientation is  $\beta = 0^\circ$ . Deuterium isotope levels in the labeled alanines are: A. 100% Ala<sup>17</sup>, 50% Ala<sup>21</sup>. B. 100% Ala<sup>15</sup>, 50% Ala<sup>13</sup>. C. 100% Ala<sup>16</sup>, 50% Ala<sup>15</sup>.

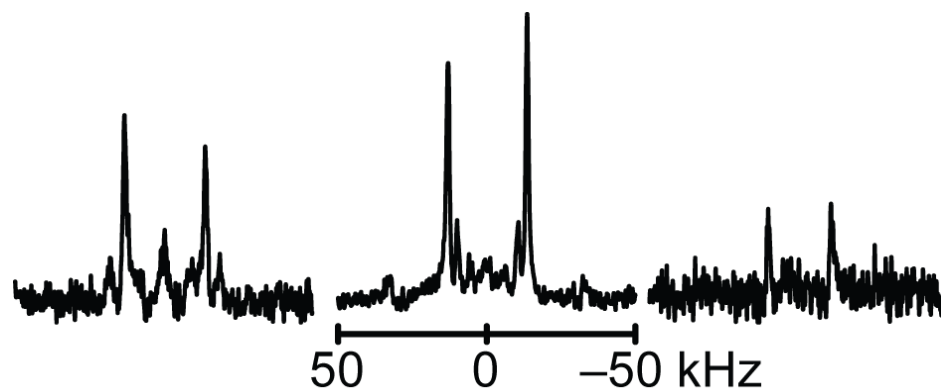

**Figure S5.**  $^2\text{H}$  NMR spectra for labeled Ala methyl groups N-terminal to the proline in GWALP23-P12, in oriented bilayers of (left to right) DLPC, DMPC and DOPC. Sample orientation is  $\beta = 0^\circ$ . The deuterium isotope abundance is 100% in Ala<sup>7</sup> and 50% in Ala<sup>9</sup>.

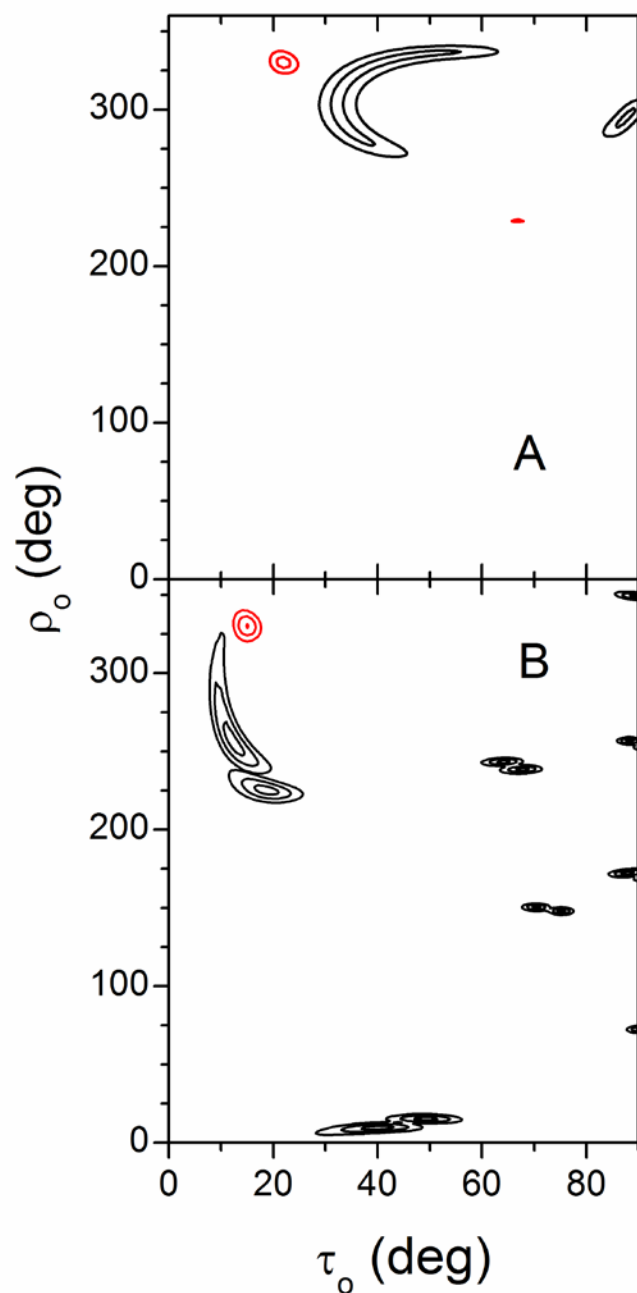

**Figure S6.** Segmental tilt in DLPC and DOPC. RMSD plots for the tilt of the N-terminal (black) and C-terminal (red) helical segments of GWALP23 P12 in oriented bilayers of (A) DLPC, and (B) DOPC. RMSD is plotted at contour levels of 1, 2 and 3 kHz, as a function of  $\tau$  and  $\rho$  values for the optimum  $S_{zz}$  in semi-static calculations.

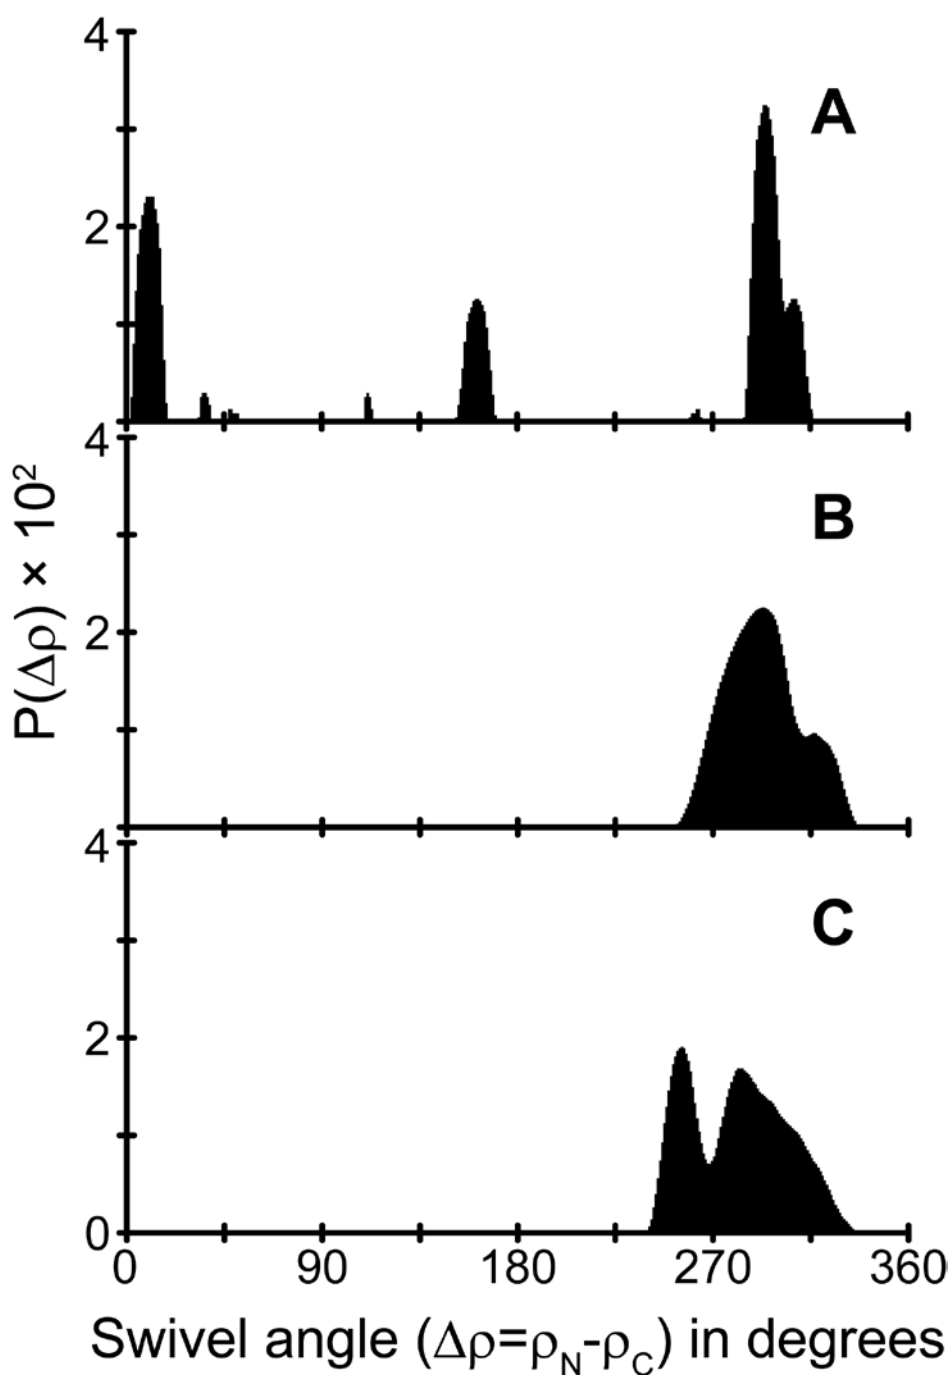

**Figure S7.** Distributions of proline-induced helix unwinding (“swivel”) angles, calculated from rmsd ( $\tau, \rho$ ) analysis of the N- and C-terminal segments of GWALP23-P12 in (A) DLPC, (B) DMPC and (C) DOPC.
